# Supplementary material for: Differential Sensitivity of Wild-Type and BRAF-Mutated Cells to Combined BRAF and Autophagy Inhibition
Source: PubMed Central journal article supplement — Biomol Ther (Seoul). 2021 Feb 8;29(4):434–44. doi: 10.4062/biomolther.2020.203 (PMC8255135; doi:10.4062/biomolther.2020.203), 2021-02-08

## Supplementary Figure Legends

**Supplementary Fig. S1. Growth response to MEK inhibitor and ERK inhibitor in cell lines with different BRAF mutational status.** Four cell lines were also treated with increasing concentrations of either MEK inhibitor trametinib (A) or ERK inhibitor SCH772984 (B) for 72 h. Cell growth was evaluated using a WST-1 assay. The relative viability of cells treated with the vehicle alone was regarded as 100 %. Values represent the mean  $\pm$  SD of quadruplicate determinants from one of three representative experiments.

**Supplementary Fig. S2. Combined effect of PLX4720 and autophagy inhibitors on the survival of cells with different BRAF mutational status.** Four cell lines were treated with increasing concentrations of PLX4720 for 72 h alone or in combination with 10  $\mu$ M of either SBI-0206965 (A) or HCQ (B). Cell growth was evaluated using a WST-1 assay. The relative viability of cells treated with the vehicle alone was regarded as 100 %. Values represent the mean  $\pm$  SD of quadruplicate determinants from one of three representative experiments.

**Supplementary Fig. S3. Combined effect of PLX4720 and MEK inhibitor on the survival of cells with different BRAF mutational status.** Four cell lines were treated with increasing concentrations of PLX4720 for 72 h alone or in combination with trametinib (0.1  $\mu$ M). Cell growth was evaluated using a WST-1 assay. The relative viability of cells treated with the vehicle alone was regarded as 100 %. Values represent the mean  $\pm$  SD of quadruplicate determinants from one of three representative experiments.

**Supplementary Fig. S4. Immunoblot showing complete knockout of ATG5 compared to their parental cells.** Cell lysates were prepared from SK-MEL-2 cells and their ATG5 KO counterparts. The  $\beta$ -actin was used as loading control.

**Supplementary Fig. S5. Combined effect of PLX4720 and early or late-stage autophagy or MEK inhibitors on the survival of ATG5 KO cells.** ATG5 KO A375P and SK-MEL-2 cells were treated with increasing concentrations of PLX4720 for 72 h alone or in combination with either 10  $\mu$ M of SBI-0206965 (A), 10  $\mu$ M of HCQ (B) or 0.1  $\mu$ M of trametinib (C). Cell growth was evaluated using a WST-1 assay. The relative viability of cells treated with the vehicle alone was regarded as 100 %. Values represent the mean  $\pm$  SD of quadruplicate determinants from one of three representative experiments.

Supplementary Fig. S1 (Yeom *et al.*)

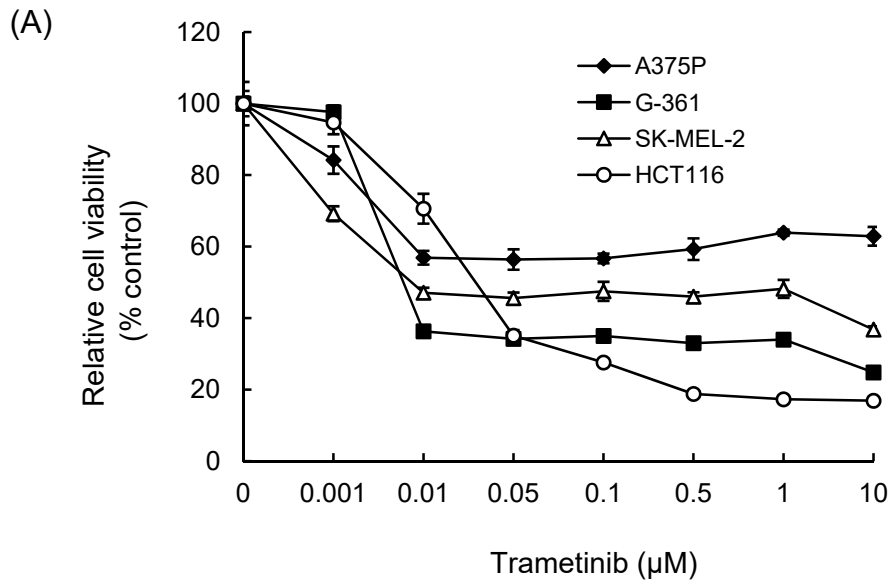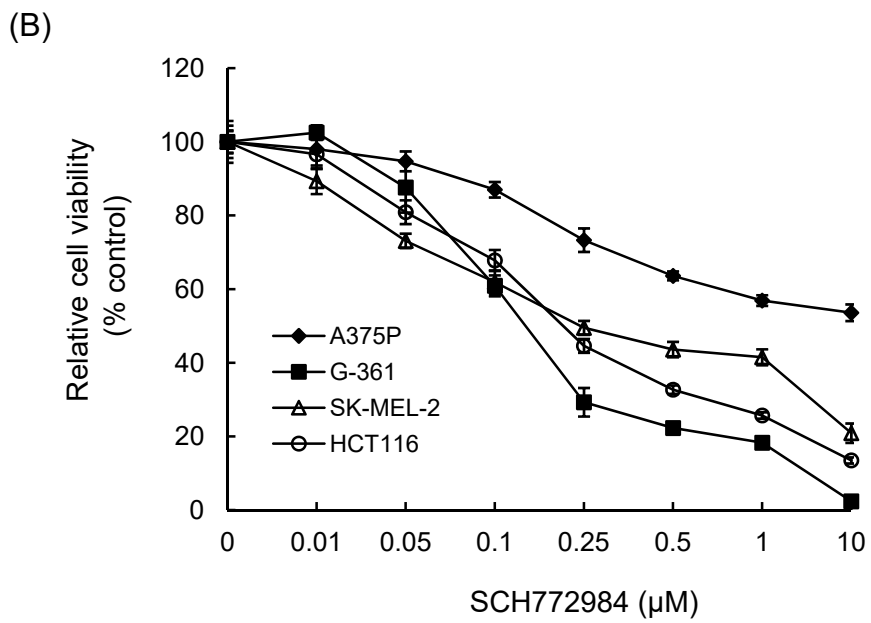

**Supplementary Fig. S2 (Yeom *et al.*)**

(A)

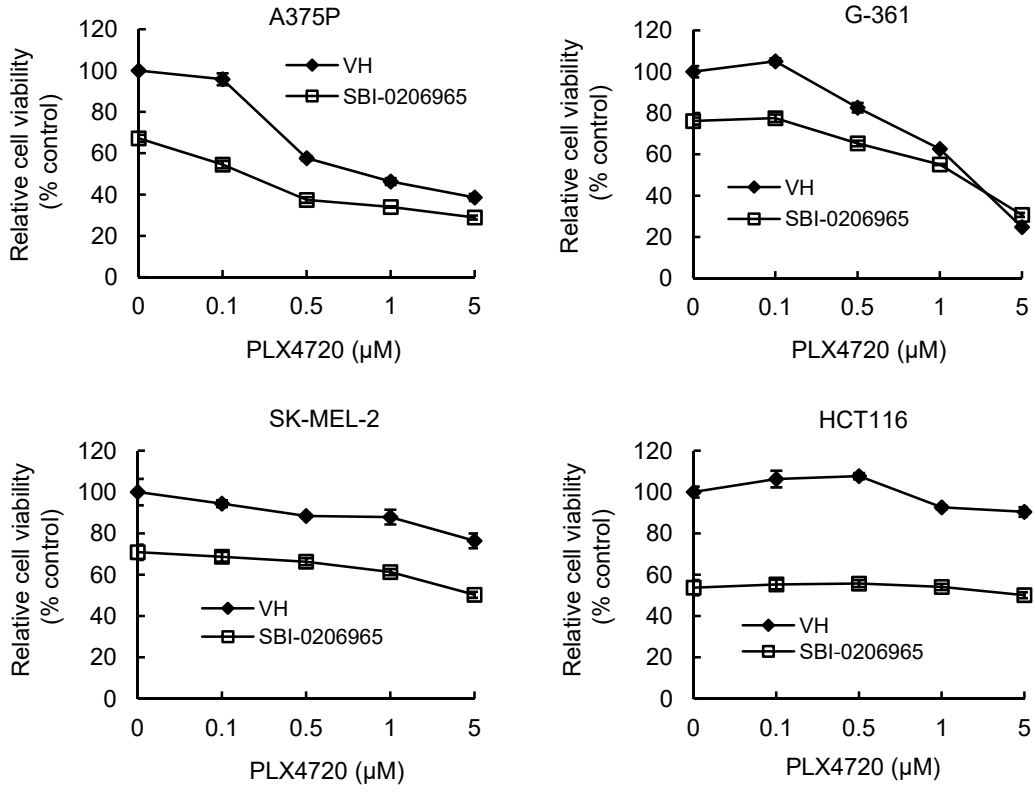

(B)

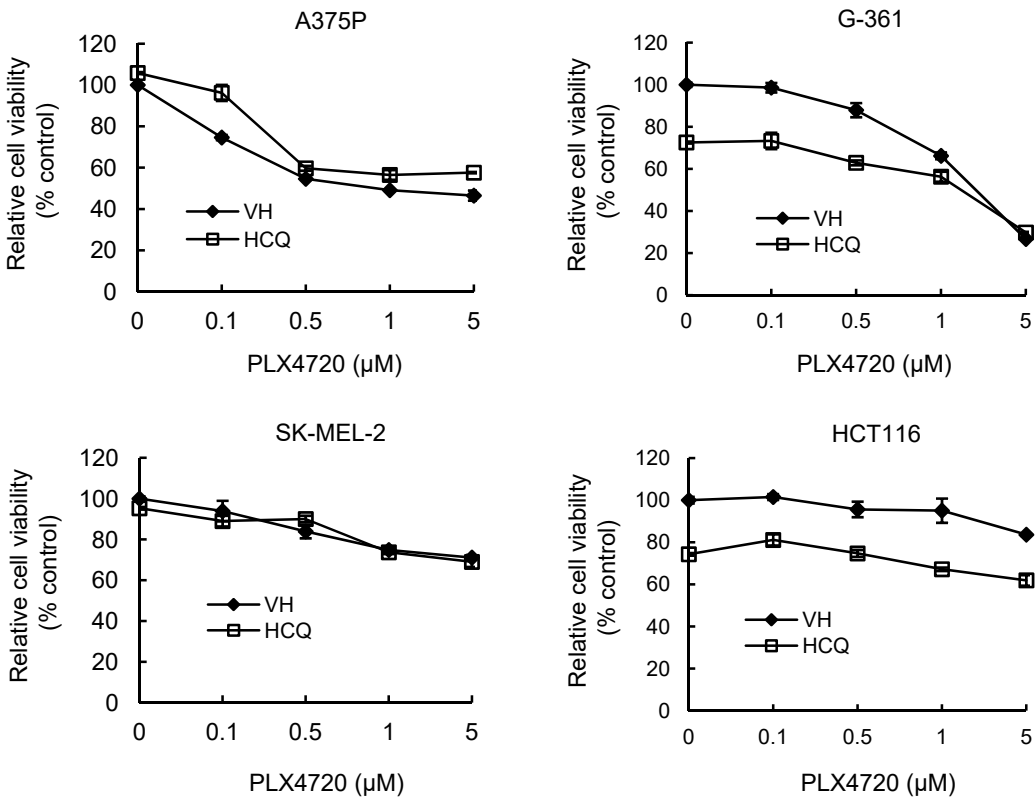

Supplementary Fig. S3 (Yeom *et al.*)

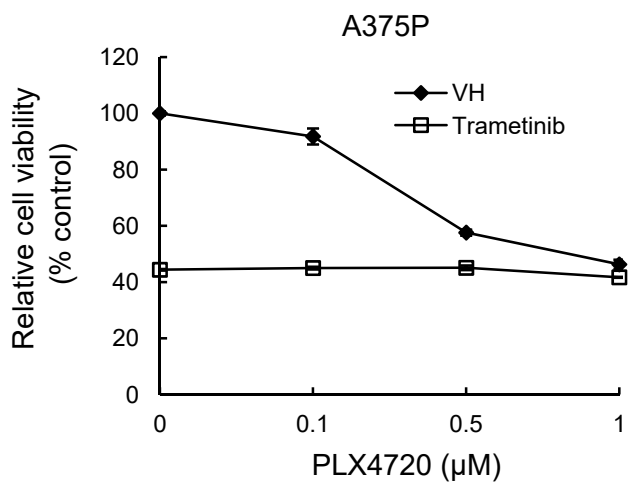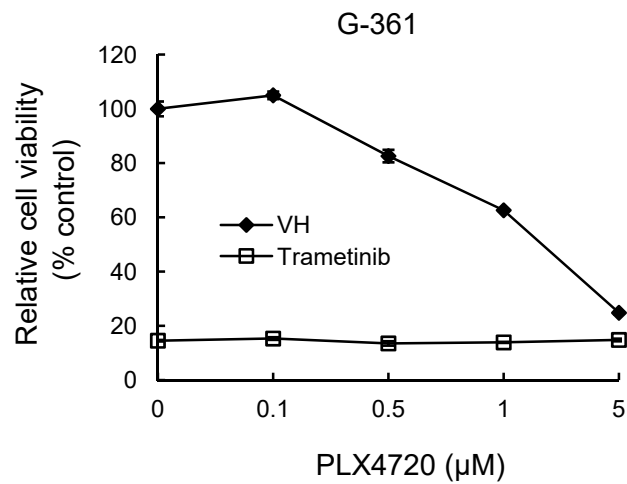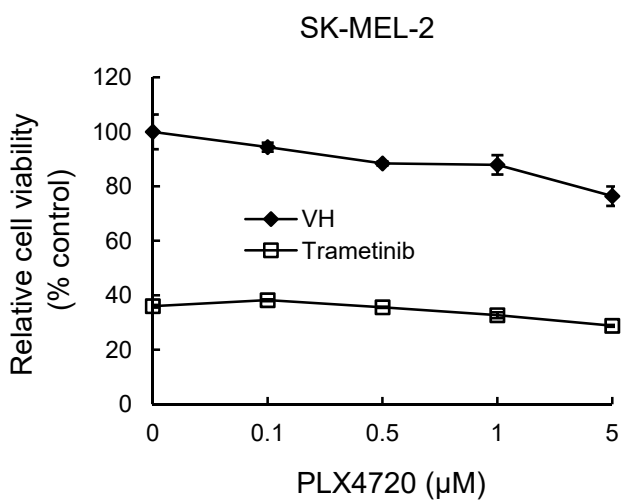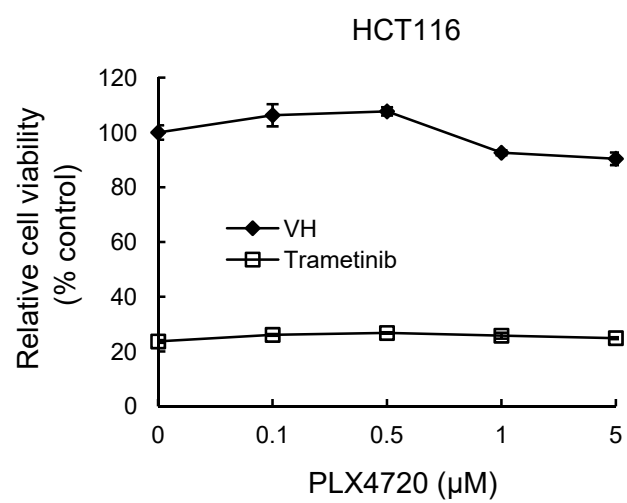

Supplementary Fig. S4 (Yeom *et al.*)

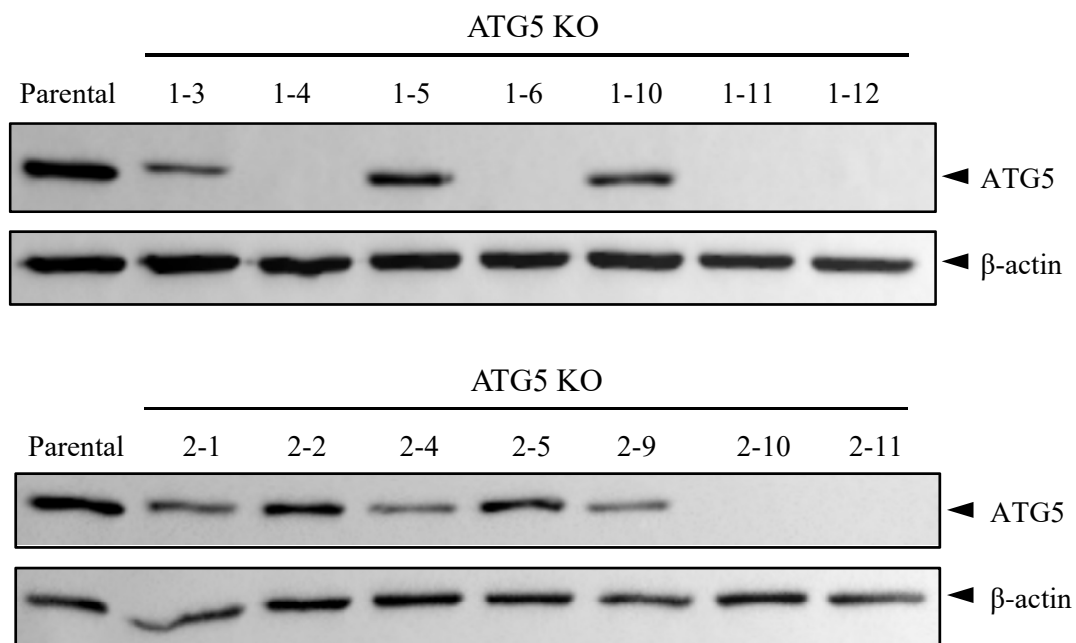

## Supplementary Fig. S5 (Yeom *et al.*)

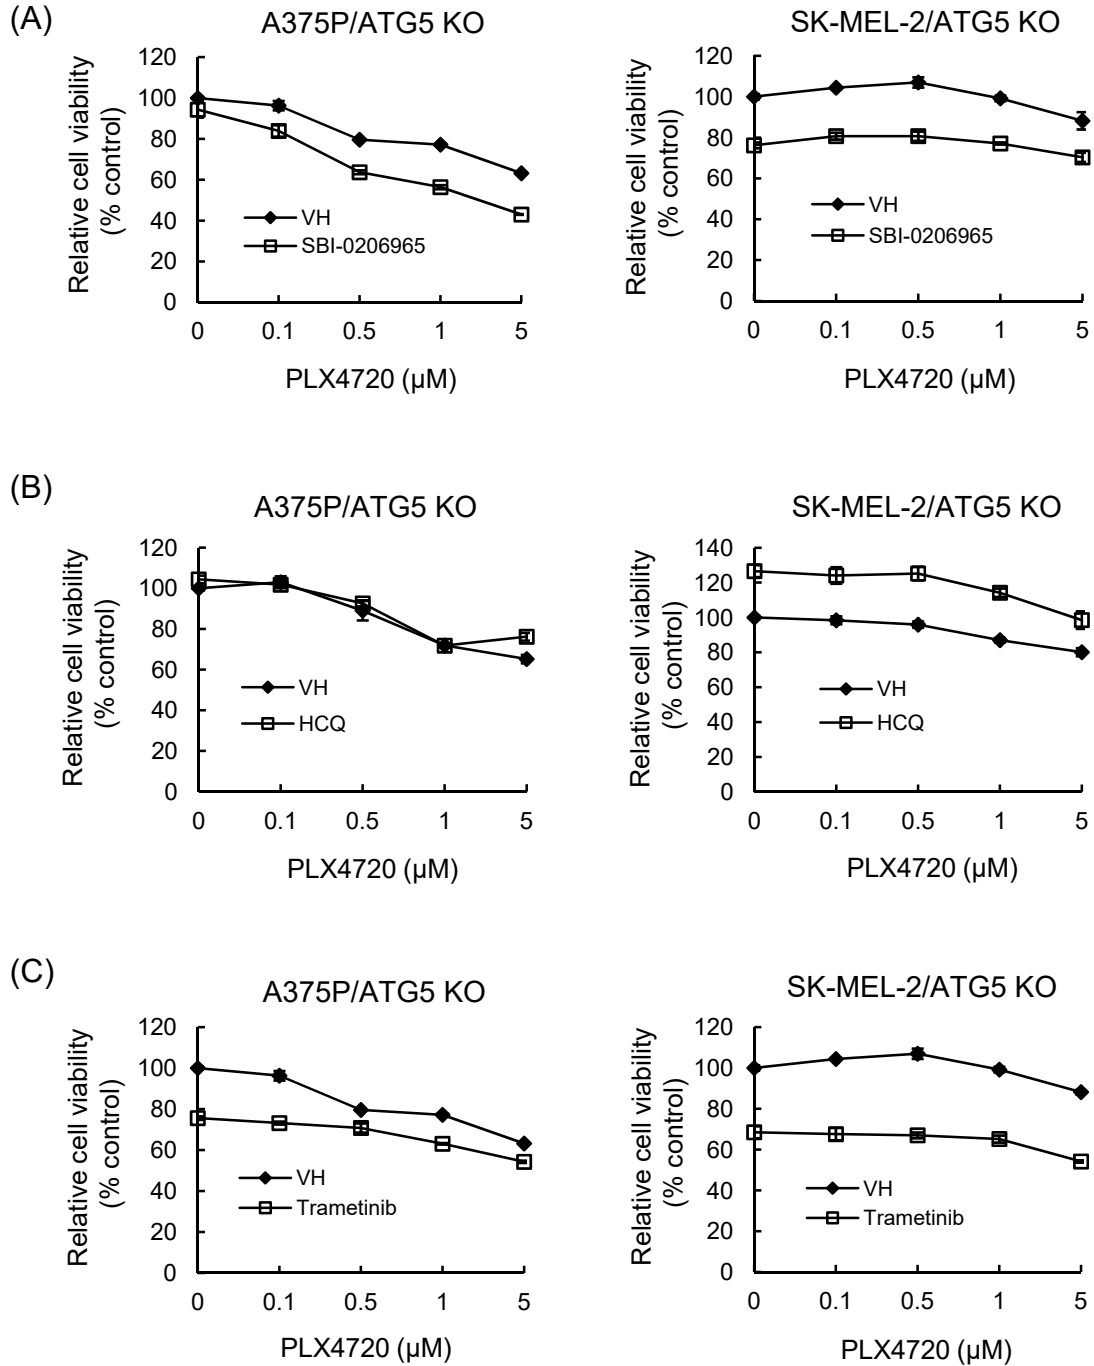

Supplement: bt-29-4-434-supple.pdf [file bt-29-4-434-supple.pdf]
